# Supplementary material for: Single crystal growth and piezoelectric features of the Ca2Nb2O7crystal with orthorhombic symmetry
Source: Royal Society of Chemistry journal article supplement (doi:10.1039/d2ce01286c), 2022-01-01
Supplement: d2ce01286c1.pdf [file d2ce01286c1.pdf]

## Supplementary Information

### Single crystal growth and piezoelectric feature of $\text{Ca}_2\text{Nb}_2\text{O}_7$ crystal with an orthorhombic symmetry

Linfang Xie, Shuai hou , Fapeng Yu,\* Xian Zhao

State Key Laboratory of Crystal Materials, Shandong University, Jinan 250100, China.

\*Corresponding authors: [fapengyu@sdu.edu.cn](mailto:fapengyu@sdu.edu.cn)

**Figure S1** Rietveld refined profile example of  $\text{Ca}_2\text{Nb}_2\text{O}_7$  powder X-ray diffraction patterns.

**Figure S2** Experimental single crystal (yellow), polycrystalline powder (red), and calculated (blue) X-ray diffraction patterns of the  $\text{Ca}_2\text{Nb}_2\text{O}_7$ .

**Table S1** Bond distances and bond valence for  $\text{Ca}_2\text{Nb}_2\text{O}_7$  crystal

**Table S2** The dipole moments of Nb-O polyhedron and Ca-O polyhedron of  $\text{Ca}_2\text{Nb}_2\text{O}_7$  crystal

**Figure S3** Polarized light microscopy images of the polished Z plate.

**Figure S4** Polarization–Electric filed loops at 1, 10, and 50 Hz, respectively, for the Z plate with amplitudes of 32 kV/cm.

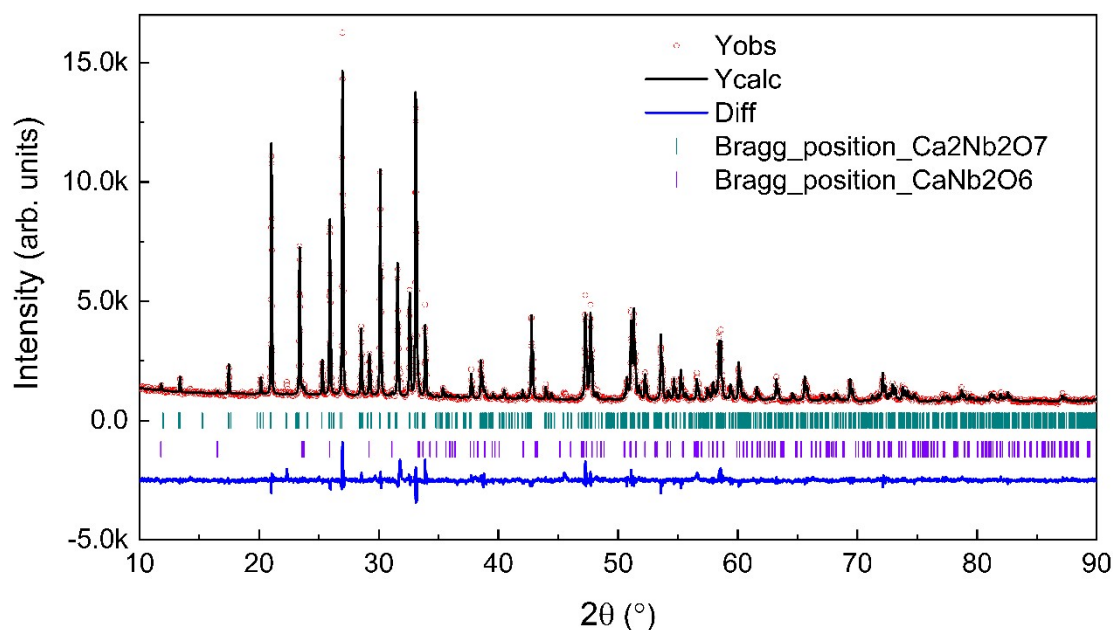

**Figure S1** Rietveld refined profile example of  $\text{Ca}_2\text{Nb}_2\text{O}_7$  powder.

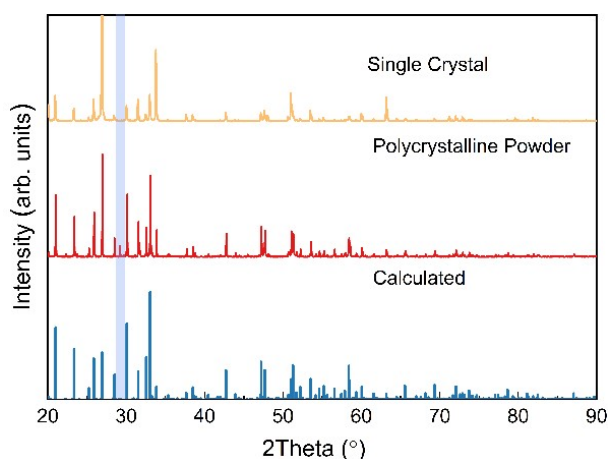

**Figure S2** Experimental single crystal (yellow), polycrystalline powder (red), and calculated X-ray diffraction patterns (blue) of the  $\text{Ca}_2\text{Nb}_2\text{O}_7$ .

**Table S1** Bond distances and bond valence for  $\text{Ca}_2\text{Nb}_2\text{O}_7$  crystal

|     | Bond Distances(Å) | Bond Valence |     | Bond Distances(Å) | Bond Valence |
|-----|-------------------|--------------|-----|-------------------|--------------|
| Nb1 |                   | 4.96185255   | Nb2 |                   | 4.932043928  |
| O1  | 2.003813364       | -0.778141474 | O1  | 2.012107109       | -0.76089306  |
| O2  | 1.841052841       | -1.208096977 | O3  | 1.986006729       | -0.816506106 |
| O3  | 1.981496328       | -0.826520453 | O4  | 1.98925785        | -0.809363047 |
| O4  | 2.222152782       | -0.431299099 | O5  | 1.84144884        | -1.206804684 |
| O6  | 1.970791432       | -0.850782756 | O6  | 2.235884024       | -0.415586322 |
| O13 | 1.9638            | -0.867011791 | O7  | 1.94069045        | -0.922890709 |
| Nb3 |                   | 4.993377972  | Nb4 |                   | 5.005184161  |
| O7  | 2.129184363       | -0.554500557 | O2  | 2.27391233        | -0.374994419 |
| O8  | 1.784517743       | -1.407540616 | O9  | 1.99703069        | -0.792537561 |
| O9  | 1.993248469       | -0.800680602 | O11 | 1.843722824       | -1.199410524 |
| O5  | 2.304681922       | -0.345070962 | O12 | 2.001614253       | -0.782780163 |
| O10 | 1.867242592       | -1.125540389 | O13 | 2.089261272       | -0.617678477 |

|     |             |              |     |             |              |
|-----|-------------|--------------|-----|-------------|--------------|
| O12 | 2.012519801 | -0.760044845 | O14 | 1.832070901 | -1.237783018 |
| Ca1 | □           | □2.092316908 | Ca2 | □           | 2.150098347  |
| O1  | 2.389134931 | -0.319529647 | O2  | 2.601635129 | -0.17992232  |
| O4  | 2.730707819 | -0.126935628 | O5  | 2.614040691 | -0.173989796 |
| O4  | 2.631789254 | -0.165840679 | O1  | 2.324153172 | -0.38087698  |
| O3  | 3.111551469 | -0.045348311 | O4  | 2.395725667 | -0.313888322 |
| O7  | 2.410780839 | -0.30137267  | O6  | 2.401341289 | -0.309160297 |
| O6  | 2.327686856 | -0.37725673  | O7  | 2.482119166 | -0.248524471 |
| O6  | 2.716895084 | -0.131763916 | O12 | 2.465144974 | -0.260191399 |
| O1  | 2.643825039 | -0.160532822 | O13 | 2.508760817 | -0.231258667 |
| □O7 | 2.330146845 | -0.374756814 | O3  | 3.058879193 | -0.052286093 |
| □O9 | 2.862158434 | -0.088979692 |     |             |              |
| Ca3 | □           | □1.69186088  | Ca4 | □           | 2.030149484  |
| O10 | 2.43793167  | -0.28004967  | O11 | 2.441632911 | -0.2772622   |
| O10 | 2.459232604 | -0.264382492 | O8  | 2.311256676 | -0.394386672 |
| O8  | 2.422047191 | -0.292334298 | O10 | 2.464933047 | -0.260340473 |
| O5  | 2.845196905 | -0.093153636 | O14 | 2.473170836 | -0.254608225 |
| O12 | 2.679706988 | -0.145695697 | O9  | 2.512774943 | -0.228763305 |
| O2  | 2.918832168 | -0.076342967 | O11 | 2.439336831 | -0.278988134 |
| O14 | 2.517428371 | -0.225904204 | O14 | 2.370758105 | -0.335800475 |
| O11 | 2.395596505 | -0.313997916 |     |             |              |

**Table S2** The dipole moments of Nb-O polyhedra and Ca-O polyhedra of  $\text{Ca}_2\text{Nb}_2\text{O}_7$  crystal.

| Specimens          | Dipole moments |        |         |       |                                 |
|--------------------|----------------|--------|---------|-------|---------------------------------|
|                    | X              | Y      | Z       | Debye | $10^{-4}$ esu.cm/Å <sup>3</sup> |
| Nb1O <sub>6</sub>  | -3.419         | 1.441  | -1.012  | 3.85  | 274.70                          |
| Nb2O <sub>6</sub>  | -4.057         | -1.383 | -1.34   | 4.49  | 320.79                          |
| Nb3O <sub>6</sub>  | -2.988         | -1.386 | -0.642  | 3.36  | 239.73                          |
| Nb4O <sub>6</sub>  | -1.144         | 1.944  | -2.943  | 3.81  | 272.18                          |
| Ca1O <sub>10</sub> | 4.647          | 0.181  | -6.866  | 8.29  | 592.40                          |
| Ca2O <sub>9</sub>  | 8.888          | -0.241 | -2.761  | 9.31  | 665.02                          |
| Ca3O <sub>8</sub>  | -5.452         | -0.060 | -1.932  | 5.78  | 413.22                          |
| Ca4O <sub>7</sub>  | 2.815          | 0.289  | 2.971   | 4.10  | 293.08                          |
| Unit Cell          | -4.003         | 3.144  | -58.104 | 58.33 | 4167                            |

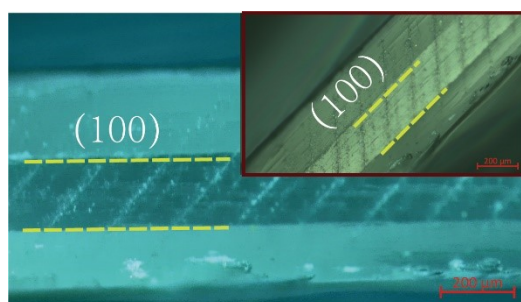

**Figure S3** Polarized light microscopy images of the polished Z plate (in large visual field).

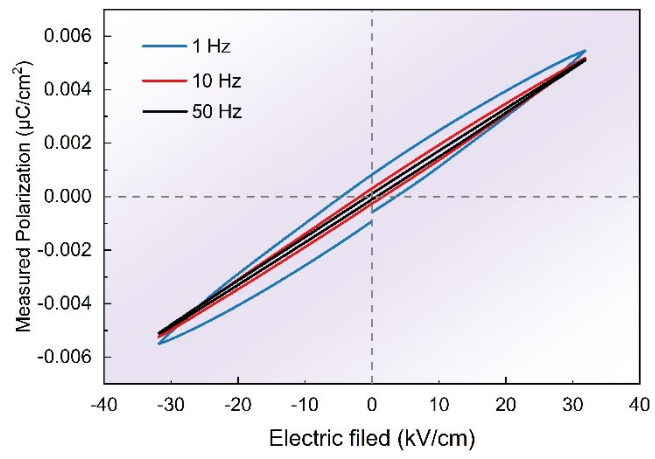

**Figure S4** Polarization–Electric field loops at 1, 10, and 50 Hz, respectively, for the Z plate with amplitudes of 32 kV/cm.
